# Supplementary material
Source: PubMed Central journal article supplement (PMC3289275)
Supplement: supp_00130.2011_Revised_Figure_2_legend.pdf [file supp_00130.2011_Revised_Figure_2_legend.pdf]

## FIGURE LEGEND

**Figure 2.** Representative immunoblot analyses using antibodies against the dopamine D<sub>2</sub> receptor using protein prepared from cultured HASM cells (100 µg), freshly dissected native human tracheal airway smooth muscle (SM) (100 µg), and freshly dissected native guinea pig (GP) tracheal SM (100 µg) identifying two known isoforms of the dopamine D<sub>2</sub> receptor (D<sub>2L</sub> and D<sub>2S</sub>). White spaces between the 3 lanes indicate that these lanes were located on the same immunoblot but were not located in neighboring lanes on the original gel and immunoblot image.
